# Supplementary material
Source: PubMed Central journal article supplement (PMC428491)

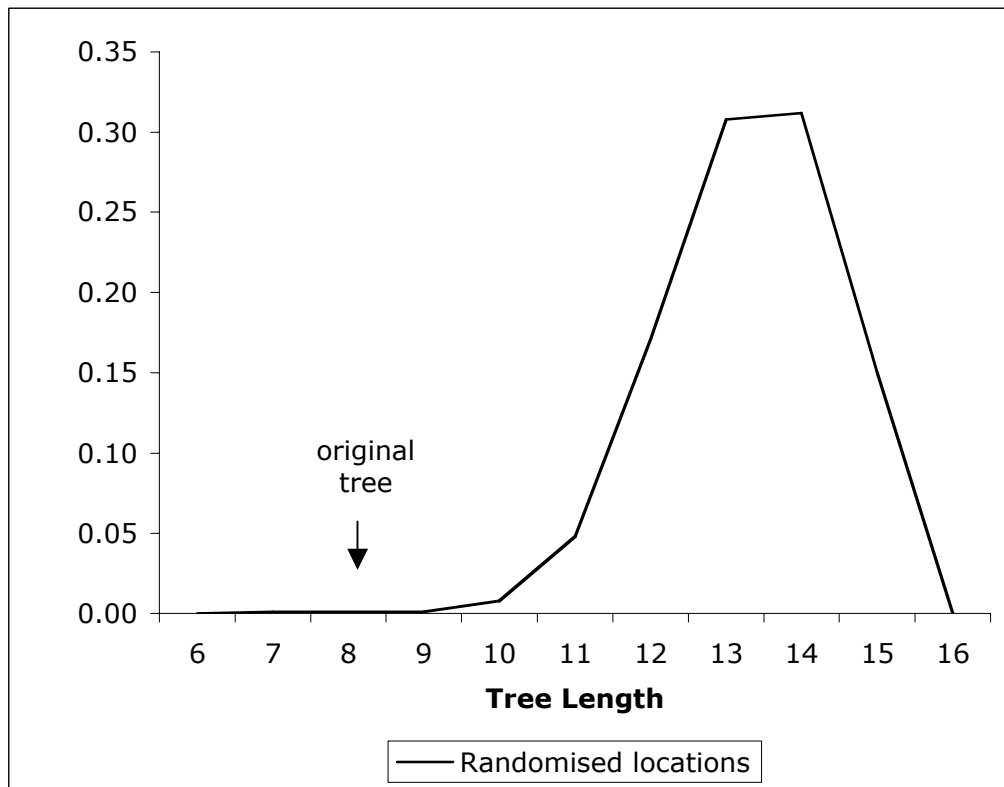

Supplement: pnas_101_24_9167__3.pdf [file pnas_101_24_9167__3.pdf]

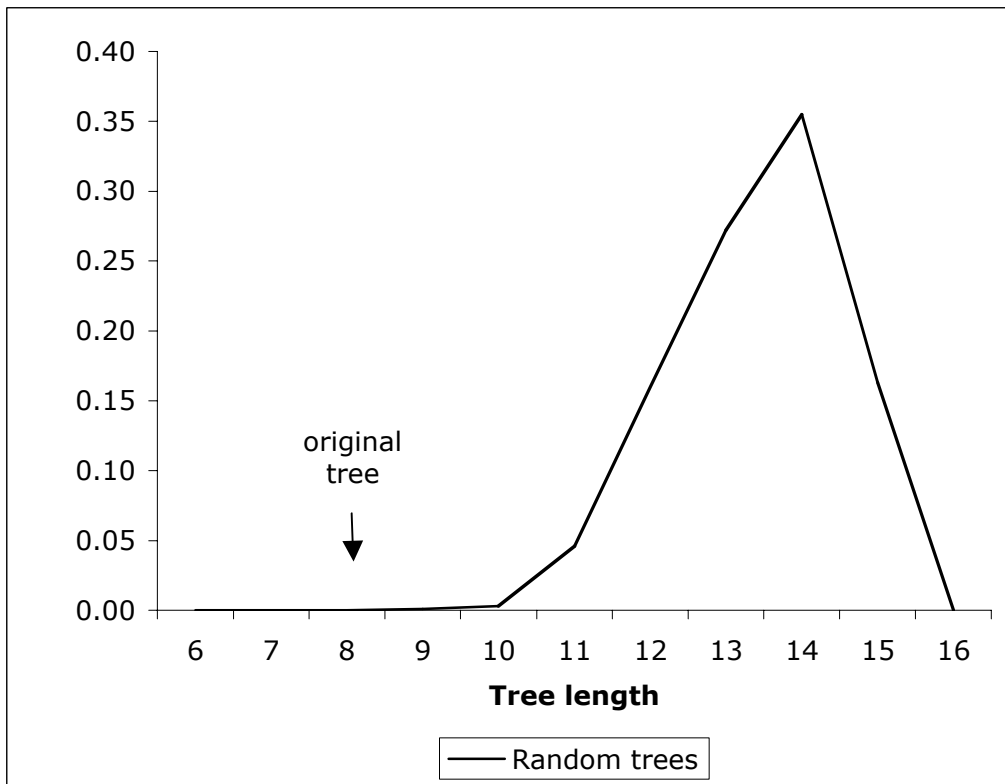

Supplement: pnas_101_24_9167__4.pdf [file pnas_101_24_9167__4.pdf]

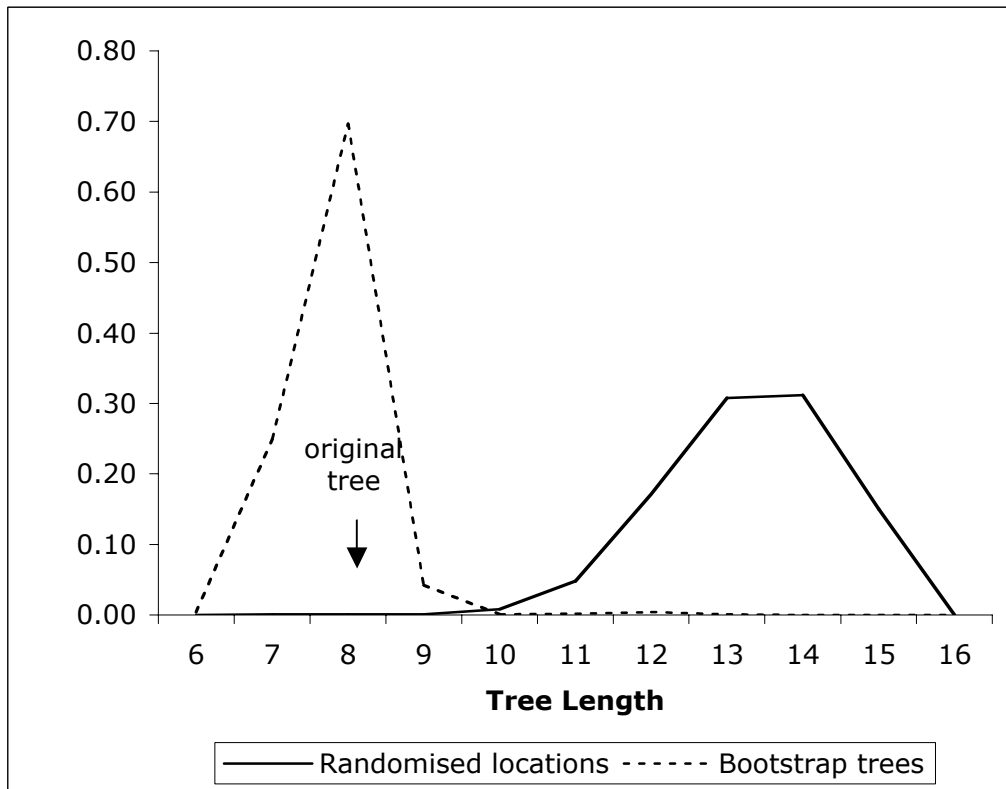

Supplement: pnas_101_24_9167__5.pdf [file pnas_101_24_9167__5.pdf]
